# Supplementary material
Source: publisher figshare collection journal article supplement (https://rs.figshare.com/ndownloader/files/35933395)
Supplement: Supplementary file 1 [file 35933395]

## Sheet: S. delicatula
Population	Photo no.	No.	Cell size	Silica size	Coverage at cell level	Leaf area	Area with silica body	Coverage at leaf level
滿月圓	2-8	1	0.827	0.161	19.468
滿月圓	2-8	2	0.765	0.13	16.9935
滿月圓	2-8	3	0.578	0.124	21.4533
滿月圓	2-8	4	0.61	0.129	21.1475
					19.7656	12.565	10.962	17.2439
滿月圓	3-7	5	0.971	0.138	14.2122
滿月圓	3-7	6	1.04	0.138	13.2692
滿月圓	3-7	7	0.957	0.134	14.0021
滿月圓	3-7	8	0.771	0.169	21.9196
					15.8508	12.706	11.238	14.0194
滿月圓	5-5	9	0.886	0.173	19.526
滿月圓	5-5	10	1.111	0.198	17.8218
滿月圓	5-5	11	0.971	0.198	20.3913
滿月圓	5-5	12	0.898	0.162	18.0401
					18.9448	45.696	40.057	16.607
北坑溪	2-7	13	1.116	0.099	8.87097
北坑溪	2-7	14	0.909	0.088	9.68097
北坑溪	2-7	15	0.8	0.097	12.125
北坑溪	2-7	16	1.049	0.102	9.72355
					10.1001	18.836	16.336	8.75959
北坑溪	1-3	17	0.932	0.176	18.8841
北坑溪	1-3	18	0.993	0.22	22.1551
北坑溪	1-3	19	0.969	0.147	15.1703
北坑溪	1-3	20	0.919	0.177	19.2601
					18.8674	10.684	9.489	16.7571
北坑溪	6-8	21	0.85	0.083	9.76471
北坑溪	6-8	22	0.776	0.085	10.9536
北坑溪	6-8	23	0.842	0.08	9.50119
北坑溪	6-8	24	1.333	0.16	12.003
					10.5556	16.479	11.324	7.25359
仙跡岩	1-11	25	0.361	0.077	21.3296
仙跡岩	1-11	26	0.216	0.069	31.9444
仙跡岩	1-11	27	0.185	0.062	33.5135
仙跡岩	1-11	28	0.198	0.047	23.7374
					27.6312	23.583	22.052	25.8374
仙跡岩	4-10	29	0.637	0.146	22.9199
仙跡岩	4-10	30	0.556	0.163	29.3165
仙跡岩	4-10	31	0.442	0.128	28.9593
仙跡岩	4-10	32	0.502	0.163	32.4701
					28.4165	20.014	17.875	25.3795
仙跡岩	2-6	33	1.67	0.327	19.5808
仙跡岩	2-6	34	1.536	0.323	21.0286
仙跡岩	2-6	35	1.715	0.401	23.3819
仙跡岩	2-6	36	1.71	0.348	20.3509
					21.0856	23.899	22.379	19.7445

## Sheet: Average-del
		Average of silica body coverage (%)
Population	Photo no.	at cell level	Photo no.	at leaf level
滿月圓	2-8	19.468	2-8	17.2439
滿月圓	2-8	16.9935	3-7	14.0194
滿月圓	2-8	21.4533	5-5	16.607
滿月圓	2-8	21.1475	2-7	8.75959
滿月圓	3-7	14.2122	1-3	16.7571
滿月圓	3-7	13.2692	6-8	7.25359
滿月圓	3-7	14.0021	1-11	25.8374
滿月圓	3-7	21.9196	4-10	25.3795
滿月圓	5-5	19.526	2-6	19.7445
滿月圓	5-5	17.8218	Average	16.8447
滿月圓	5-5	20.3913	SD	6.40004
滿月圓	5-5	18.0401
北坑溪	2-7	8.87097	SE	2.13335
北坑溪	2-7	9.68097
北坑溪	2-7	12.125
北坑溪	2-7	9.72355
北坑溪	1-3	18.8841
北坑溪	1-3	22.1551
北坑溪	1-3	15.1703
北坑溪	1-3	19.2601
北坑溪	6-8	9.76471
北坑溪	6-8	10.9536
北坑溪	6-8	9.50119
北坑溪	6-8	12.003
仙跡岩	1-11	21.3296
仙跡岩	1-11	31.9444
仙跡岩	1-11	33.5135
仙跡岩	1-11	23.7374
仙跡岩	4-10	22.9199
仙跡岩	4-10	29.3165
仙跡岩	4-10	28.9593
仙跡岩	4-10	32.4701
仙跡岩	2-6	19.5808
仙跡岩	2-6	21.0286
仙跡岩	2-6	23.3819
仙跡岩	2-6	20.3509
	Average	19.0242
	SD	6.71737
	SE	1.11956

## Sheet: S. erythropus
Photo no.	No.	Cell size	Silica size	Sum of silica size	Coverage	Leaf area	Area with silica body	Coverage at leaf level
e1-5	1	4.459	0.148	0.973	21.821	30.678	0.824	2.68596
e1-5	1		0.126
e1-5	1		0.109
e1-5	1		0.115
e1-5	1		0.125
e1-5	1		0.137
e1-5	1		0.128
e1-5	1		0.085
e1-5	2	3.961	0.155	0.844	21.3078
e1-5	2		0.102
e1-5	2		0.104
e1-5	2		0.089
e1-5	2		0.072
e1-5	2		0.124
e1-5	2		0.101
e1-5	2		0.097
e1-5	3	3.345	0.097	0.646	19.3124
e1-5	3		0.075
e1-5	3		0.052
e1-5	3		0.052
e1-5	3		0.068
e1-5	3		0.046
e1-5	3		0.068
e1-5	3		0.067
e1-5	3		0.121
e1-5	4	3.508	0.309	1.069	30.4732
e1-5	4		0.223
e1-5	4		0.13
e1-5	4		0.149
e1-5	4		0.132
e1-5	4		0.126
e1-5	5	2.637	0.117	0.658	24.9526
e1-5	5		0.107
e1-5	5		0.086
e1-5	5		0.11
e1-5	5		0.08
e1-5	5		0.065
e1-5	5		0.093
e2-4	6	0.297	0.018	0.095	31.9865	785203	21889.5	2.78776
e2-4	6		0.02
e2-4	6		0.019
e2-4	6		0.022
e2-4	6		0.016
e2-4	7	0.331	0.014	0.101	30.5136
e2-4	7		0.013
e2-4	7		0.015
e2-4	7		0.014
e2-4	7		0.012
e2-4	7		0.009
e2-4	7		0.01
e2-4	7		0.014
e2-4	8	0.285	0.018	0.097	34.0351
e2-4	8		0.021
e2-4	8		0.015
e2-4	8		0.024
e2-4	8		0.019
e2-4	9	0.351	0.017	0.109	31.0541
e2-4	9		0.015
e2-4	9		0.014
e2-4	9		0.015
e2-4	9		0.014
e2-4	9		0.018
e2-4	9		0.016
e2-4	10	0.381	0.023	0.132	34.6457
e2-4	10		0.021
e2-4	10		0.023
e2-4	10		0.021
e2-4	10		0.022
e2-4	10		0.022
e2-4	11	3.917	0.062	0.796	20.3217
e2-4	11		0.054
e2-4	11		0.034
e2-4	11		0.062
e2-4	11		0.031
e2-4	11		0.076
e2-4	11		0.067
e2-4	11		0.061
e2-4	11		0.039
e2-4	11		0.018
e2-4	11		0.05
e2-4	11		0.031
e2-4	11		0.052
e2-4	11		0.054
e2-4	11		0.044
e2-4	11		0.061
e2-4	12	5.425	0.082	0.988	18.212
e2-4	12		0.055
e2-4	12		0.048
e2-4	12		0.057
e2-4	12		0.057
e2-4	12		0.077
e2-4	12		0.064
e2-4	12		0.052
e2-4	12		0.072
e2-4	12		0.077
e2-4	12		0.072
e2-4	12		0.056
e2-4	12		0.084
e2-4	12		0.071
e2-4	12		0.064
e2-4	13	3.734	0.107	0.818	21.9068
e2-4	13		0.06
e2-4	13		0.085
e2-4	13		0.085
e2-4	13		0.06
e2-4	13		0.073
e2-4	13		0.051
e2-4	13		0.084
e2-4	13		0.055
e2-4	13		0.082
e2-4	13		0.076
e2-4	14	4.58	0.102	0.837	18.2751
e2-4	14		0.073
e2-4	14		0.061
e2-4	14		0.069
e2-4	14		0.062
e2-4	14		0.076
e2-4	14		0.055
e2-4	14		0.037
e2-4	14		0.042
e2-4	14		0.083
e2-4	14		0.072
e2-4	14		0.05
e2-4	14		0.055
5-4	15	3.899	0.081	0.536	13.7471	13.94	1.044	7.48924
5-4	15		0.036
5-4	15		0.051
5-4	15		0.019
5-4	15		0.032
5-4	15		0.037
5-4	15		0.039
5-4	15		0.041
5-4	15		0.039
5-4	15		0.022
5-4	15		0.038
5-4	15		0.044
5-4	15		0.057
5-4	16	4.304	0.078	0.705	16.3801
5-4	16		0.074
5-4	16		0.048
5-4	16		0.041
5-4	16		0.057
5-4	16		0.045
5-4	16		0.05
5-4	16		0.054
5-4	16		0.037
5-4	16		0.029
5-4	16		0.035
5-4	16		0.054
5-4	16		0.047
5-4	16		0.056
5-4	17	3.74	0.058	0.597	15.9626
5-4	17		0.045
5-4	17		0.041
5-4	17		0.07
5-4	17		0.046
5-4	17		0.058
5-4	17		0.033
5-4	17		0.033
5-4	17		0.035
5-4	17		0.023
5-4	17		0.05
5-4	17		0.048
5-4	17		0.057
5-4	18	3.808	0.054	0.651	17.0956
5-4	18		0.043
5-4	18		0.024
5-4	18		0.028
5-4	18		0.044
5-4	18		0.051
5-4	18		0.025
5-4	18		0.045
5-4	18		0.039
5-4	18		0.038
5-4	18		0.038
5-4	18		0.051
5-4	18		0.034
5-4	18		0.052
5-4	18		0.085
4-4	19	5.638	0.094	1.048	18.5882	3285789	205394	6.25098
4-4	19		0.065
4-4	19		0.05
4-4	19		0.061
4-4	19		0.078
4-4	19		0.064
4-4	19		0.051
4-4	19		0.051
4-4	19		0.06
4-4	19		0.059
4-4	19		0.071
4-4	19		0.063
4-4	19		0.046
4-4	19		0.079
4-4	19		0.077
4-4	19		0.079
4-4	20	4.34	0.115	0.849	19.5622
4-4	20		0.064
4-4	20		0.058
4-4	20		0.069
4-4	20		0.065
4-4	20		0.062
4-4	20		0.056
4-4	20		0.034
4-4	20		0.045
4-4	20		0.085
4-4	20		0.09
4-4	20		0.059
4-4	20		0.047
					23.0077
3-1						11.38	0.808	7.10018
2-1						9.154	0.645	7.0461
1-1						11.128	1.289	11.5834

## Sheet: Average-ery
		Average of silica body coverage (%)
Population	Photo no.	at cell level	Photo no.	at leaf level
e1-5	1	21.821	e1-5	2.68596
e1-5	2	21.3078	e2-4	2.78776
e1-5	3	19.3124	5-4	7.48924
e1-5	4	30.4732	4-4	6.25098
e1-5	5	24.9526	3-1	7.10018
e2-4	6	31.9865	2-1	7.0461
e2-4	7	30.5136	1-1	11.5834
e2-4	8	34.0351	Average	6.42052
e2-4	9	31.0541	SD	3.05023
e2-4	10	34.6457
e2-4	11	20.3217	SE	1.15288
e2-4	12	18.212
e2-4	13	21.9068
e2-4	14	18.2751
5-4	15	13.7471
5-4	16	16.3801
5-4	17	15.9626
5-4	18	17.0956
4-4	19	18.5882
4-4	20	19.5622
	Average	23.0077
	SD	6.63212
	SE	1.48299

## Sheet: S. moellendorffii
Population	Photo no.	No.	Cell size	Silica size	Sum of silica size	Coverage	Leaf area	Area with silica body	Coverage at leaf level
青山瀑布	1-4	1	0.267	0.005	0.026	9.73783	14.65	0.293	2
青山瀑布	1-4	1		0.006
青山瀑布	1-4	1		0.006
青山瀑布	1-4	1		0.004
青山瀑布	1-4	1		0.005
青山瀑布	1-4	2	0.211	0.006	0.023	10.9005
青山瀑布	1-4	2		0.006
青山瀑布	1-4	2		0.006
青山瀑布	1-4	2		0.005
青山瀑布	1-4	3	0.223	0.006	0.027	12.1076
青山瀑布	1-4	3		0.005
青山瀑布	1-4	3		0.005
青山瀑布	1-4	3		0.005
青山瀑布	1-4	3		0.006
青山瀑布	1-4	4	0.309	0.006	0.036	11.6505
青山瀑布	1-4	4		0.005
青山瀑布	1-4	4		0.007
青山瀑布	1-4	4		0.007
青山瀑布	1-4	4		0.006
青山瀑布	1-4	4		0.005
青山瀑布	1-4	5	0.226	0.008	0.025	11.0619
青山瀑布	1-4	5		0.005
青山瀑布	1-4	5		0.006
青山瀑布	1-4	5		0.006
奧萬大	2-7	6	0.944	0.079	0.199	21.0805	49.106	1.538	3.132
奧萬大	2-7	6		0.027
奧萬大	2-7	6		0.028
奧萬大	2-7	6		0.038
奧萬大	2-7	6		0.027
奧萬大	2-7	7	1.252	0.061	0.217	17.3323
奧萬大	2-7	7		0.042
奧萬大	2-7	7		0.043
奧萬大	2-7	7		0.033
奧萬大	2-7	7		0.038
奧萬大	2-7	8	1.375	0.028	0.157	11.4182
奧萬大	2-7	8		0.03
奧萬大	2-7	8		0.027
奧萬大	2-7	8		0.024
奧萬大	2-7	8		0.028
奧萬大	2-7	8		0.02
奧萬大	2-7	9	1.09	0.025	0.099	9.08257
奧萬大	2-7	9		0.025
奧萬大	2-7	9		0.024
奧萬大	2-7	9		0.025
奧萬大	4-6	10	3.259	0.086	0.381	11.6907	11.116	0.257	2.31198
奧萬大	4-6	10		0.096
奧萬大	4-6	10		0.103
奧萬大	4-6	10		0.096
奧萬大	4-6	11	3.754	0.107	0.429	11.4278
奧萬大	4-6	11		0.068
奧萬大	4-6	11		0.08
奧萬大	4-6	11		0.075
奧萬大	4-6	11		0.099
奧萬大	4-6	12	3.07	0.137	0.437	14.2345
奧萬大	4-6	12		0.116
奧萬大	4-6	12		0.101
奧萬大	4-6	12		0.083
奧萬大	4-6	13	2.251	0.123	0.436	19.3692
奧萬大	4-6	13		0.112
奧萬大	4-6	13		0.086
奧萬大	4-6	13		0.115
奧萬大	3-6	14	2.43	0.09	0.359	14.7737	49.252	1.871	3.79883
奧萬大	3-6	14		0.069
奧萬大	3-6	14		0.063
奧萬大	3-6	14		0.137
奧萬大	3-6	15	2.609	0.14	0.382	14.6416
奧萬大	3-6	15		0.117
奧萬大	3-6	15		0.125
奧萬大	3-6	16	2.861	0.055	0.49	17.1269
奧萬大	3-6	16		0.179
奧萬大	3-6	16		0.111
奧萬大	3-6	16		0.145
奧萬大	3-6	17	2.554	0.125	0.411	16.0924
奧萬大	3-6	17		0.081
奧萬大	3-6	17		0.082
奧萬大	3-6	17		0.062
奧萬大	3-6	17		0.061
奧萬大	3-6	18	3.099	0.068	0.49	15.8116
奧萬大	3-6	18		0.083
奧萬大	3-6	18		0.09
奧萬大	3-6	18		0.089
奧萬大	3-6	18		0.087
奧萬大	3-6	18		0.073
涼山瀑布	1-8	19	0.95	0.02	0.115	12.1053	14.514	0.743	5.1192
涼山瀑布	1-8	19		0.018
涼山瀑布	1-8	19		0.017
涼山瀑布	1-8	19		0.018
涼山瀑布	1-8	19		0.014
涼山瀑布	1-8	19		0.016
涼山瀑布	1-8	19		0.012
涼山瀑布	1-8	20	0.803	0.024	0.107	13.325
涼山瀑布	1-8	20		0.017
涼山瀑布	1-8	20		0.016
涼山瀑布	1-8	20		0.018
涼山瀑布	1-8	20		0.018
涼山瀑布	1-8	20		0.014
	2-1						13.915	0.605	4.34783
	3-1						15.256	0.804	5.27006

## Sheet: Average-moe
			Average of silica body coverage (%)
Population	Photo no.	No.	at cell level	Photo no.	at leaf level
青山瀑布	1-4	1	9.73783	1-4	2
	1-4	2	10.9005	2-7	3.132
	1-4	3	12.1076	4-6	2.31198
	1-4	4	11.6505	3-6	3.79883
	1-4	5	11.0619	1-8	5.1192
奧萬大	2-7	6	21.0805	2-1	4.34783
	2-7	7	17.3323	3-1	5.27006
	2-7	8	11.4182	Average	3.71141
	2-7	9	9.08257	SD	1.29402
奧萬大	4-6	10	11.6907
	4-6	11	11.4278	SE	0.489094
	4-6	12	14.2345
	4-6	13	19.3692
奧萬大	3-6	14	14.7737
	3-6	15	14.6416
	3-6	16	17.1269
	3-6	17	16.0924
	3-6	18	15.8116
涼山瀑布	1-8	19	12.1053
	1-8	20	13.325
		Average	13.7485
		SD	3.2416
		SE	0.724844
